# Supplementary material for: Knowledge, Attitude, and Practice (KAP) Status toward Clinical Reasoning and Evidence-Based Medicine among the Medical Interns and Gynecology Residents of Iran University of Medical Sciences
Source: ScientificWorldJournal. 2024 Mar 13;2024:6546432. doi: 10.1155/2024/6546432 (PMC10954360; doi:10.1155/2024/6546432)
Supplement: Supplementary Materials — Table Supplementary 1 shows the components and items of the clinical reasoning questionnaire and related statistical information. Table Supplementary 2 shows the components and items of the EBM questionnaire and related statistical information. [file 6546432.f1.zip]

Archive with 2 entries (2 files):
- S1 (2).docx
- S2 (2).docx
